# Supplementary material
Source: publisher figshare collection journal article supplement (https://sage.figshare.com/ndownloader/files/24163569)
Supplement: Supplementary file 1 [file 24163569]

## SUPPLEMENTAL MATERIAL

### Supplemental Tables

#### **Supplement Table I. Modified Rankin Scale for Measuring the Degree of Disability or Dependence in the Daily Activities of People who Experience a Stroke**

| <b>Score</b> | <b>Description</b>                                                                                                        |
|--------------|---------------------------------------------------------------------------------------------------------------------------|
| 0            | No symptoms at all                                                                                                        |
| 1            | No significant disability despite symptoms; able to carry out all usual duties and activities                             |
| 2            | Slight disability; unable to carry out all previous activities, but able to look after own affairs without assistance     |
| 3            | Moderate disability; requiring some help, but able to walk without assistance                                             |
| 4            | Moderate severe disability; unable to walk without assistance and unable to attend to own bodily needs without assistance |
| 5            | Severe disability; bedridden; incontinent and requiring constant nursing care and attention                               |
| 6            | Dead                                                                                                                      |

**Supplement Table II. Comparison of baseline characteristics of patients in the current sub-study versus those with missing 90-day mRS in the BEST-MSU study**

| Characteristic                            | 90-day mRS not missing | 90-day mRS missing | p-value |
|-------------------------------------------|------------------------|--------------------|---------|
| Number of patients                        | 240                    | 205                |         |
| Age, mean (SD)                            | 63.94 (15.78)          | 66.34 (14.58)      | 0.099   |
| Baseline NIHSS, median [IQR]              | 7.00 [5.00, 12.00]     | 9.00 [5.00, 17.00] | 0.045   |
| Male Gender, n (%)                        | 115 (47.9)             | 104 (50.7)         | 0.619   |
| Ethnicity, n (%)                          |                        |                    | 0.756   |
| Hispanic or Latino                        | 47 (19.6)              | 39 (19.0)          |         |
| Not Hispanic or Latino                    | 193 (80.4)             | 165 (80.5)         |         |
| Not reported                              | 0 (0.0)                | 1 (0.5)            |         |
| Race, n (%)                               |                        |                    | 0.882   |
| American Indian or Alaska Native          | 1 (0.4)                | 1 (0.5)            |         |
| Asian                                     | 10 (4.2)               | 7 (3.4)            |         |
| Black or African-American                 | 93 (38.8)              | 76 (37.1)          |         |
| Native Hawaiian or other Pacific Islander | 1 (0.4)                | 0 (0.0)            |         |
| White                                     | 131 (54.6)             | 120 (58.5)         |         |
| Not reported                              | 2 (0.8)                | 1 (0.5)            |         |
| Unknown                                   | 2 (0.8)                | 0 (0.0)            |         |
| Education level, n (%)                    |                        |                    | 0.005   |
| Less than high school                     | 41 (17.1)              | 43 (21.2)          |         |
| GED/high school diploma                   | 73 (30.4)              | 62 (30.5)          |         |
| Some college                              | 65 (27.1)              | 34 (16.7)          |         |
| College degree                            | 37 (15.4)              | 36 (17.7)          |         |
| Graduate school                           | 24 (10.0)              | 20 (9.9)           |         |
| Missing                                   | 0 (0.0)                | 8 (3.9)            |         |
| Pre-stroke mRS, n (%)                     |                        |                    | 0.031   |
| 0                                         | 170 (70.8)             | 121 (59.0)         |         |
| 1                                         | 26 (10.8)              | 23 (11.2)          |         |
| 2                                         | 15 (6.2)               | 23 (11.2)          |         |
| 3                                         | 25 (10.4)              | 26 (12.7)          |         |
| 4                                         | 4 (1.7)                | 10 (4.9)           |         |
| 5                                         | 0 (0.0)                | 2 (1.0)            |         |

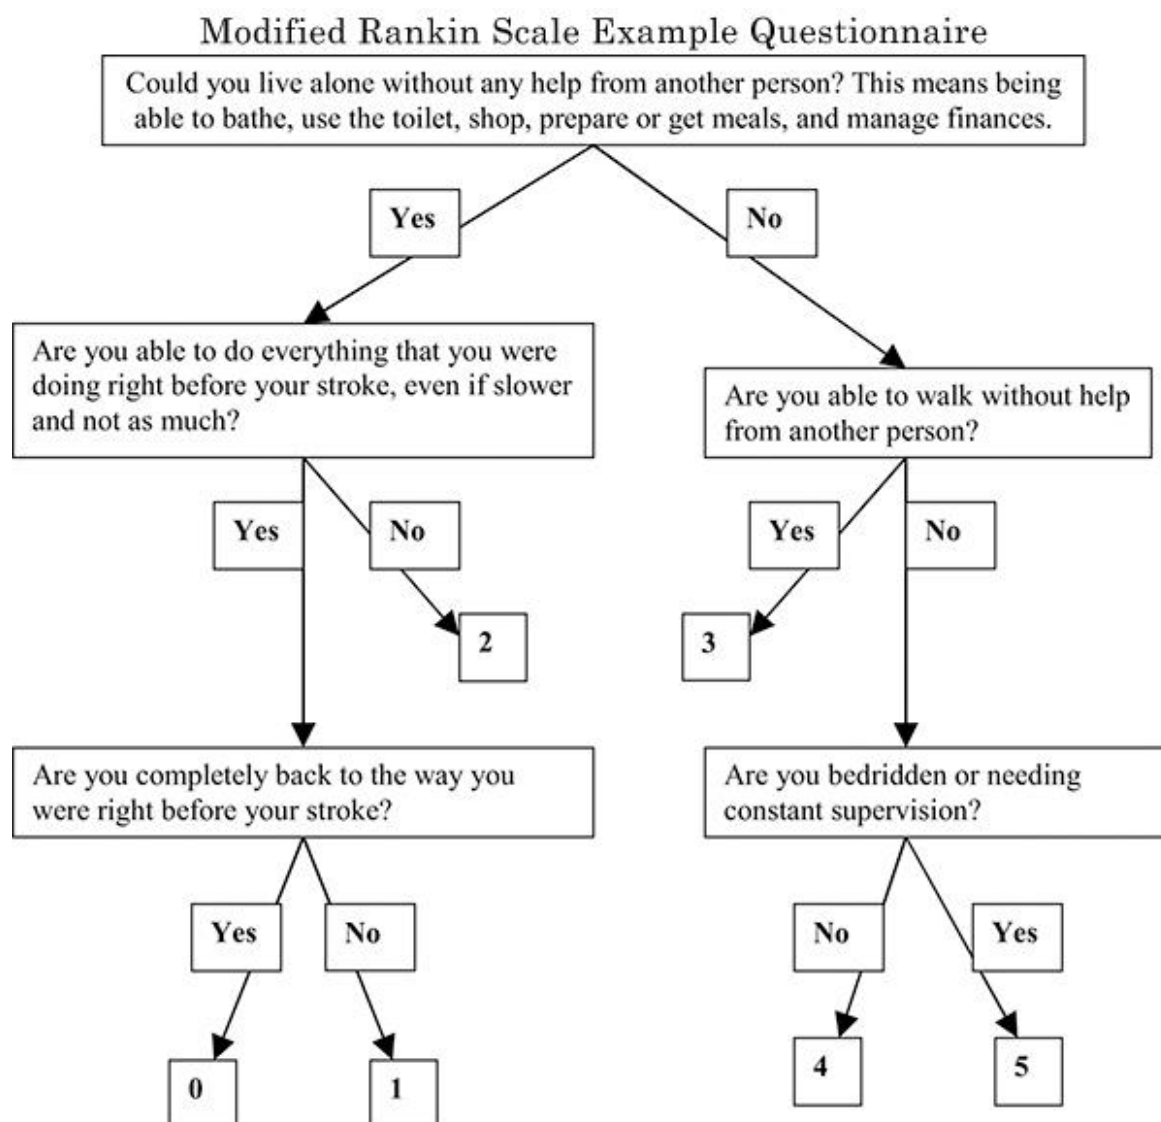

**Supplement Figure I. Modified Rankin Scale Questionnaire**
